# Supplementary material
Source: Royal Society of Chemistry journal article supplement (doi:10.1039/d5ta10291j)
Supplement: d5ta10291j1.pdf [file d5ta10291j1.pdf]

## Supplementary Information (SI) for

# Facile Embedding of Aromatic Carbon Rings into g-C<sub>3</sub>N<sub>4</sub> Framework for Boosting Piezocatalytic Water Splitting

Yingfeng Zhou,<sup>a</sup> Xiupeng Tang,<sup>a</sup> Jie Yuan,<sup>b</sup> Junhao Yang,<sup>a</sup> Peijun Yu,<sup>a</sup> Difa Xu,<sup>a</sup>  
Shiying Zhang,<sup>a</sup> Hui Wan\*<sup>a</sup> and Wenhui Feng\*<sup>a</sup>

<sup>a</sup> *Hunan Province Key Laboratory of Applied Environmental Photocatalysis, Changsha University, Changsha, 410022, P. R. China.*

<sup>b</sup> *State Key Laboratory of Photocatalysis on Energy and Environment, Fuzhou University, Fuzhou, 350116, P. R. China*

*\*Corresponding author.*

E-mail addresses: [fengwenhui1991@126.com](mailto:fengwenhui1991@126.com) (W. Feng); [huiwan@hnu.edu.cn](mailto:huiwan@hnu.edu.cn) (H. Wan)

### **This PDF file includes:**

Figures. S1-S5

Calculation of energy conversion efficiency

Table S1

References

**Figure S1**

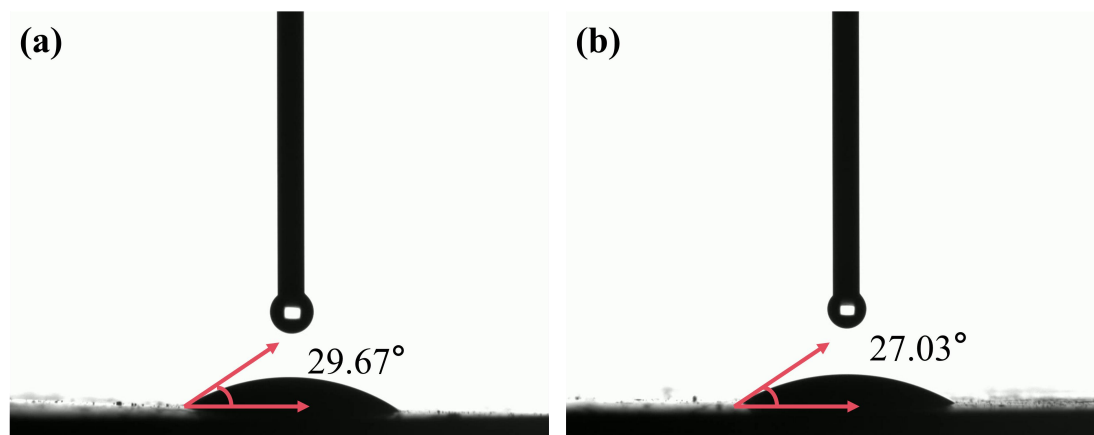

**Fig. S1** Water contact angle measurements of (a) pure g-C<sub>3</sub>N<sub>4</sub> and (b) optimal CNA<sub>40</sub> sample.

Figure S2

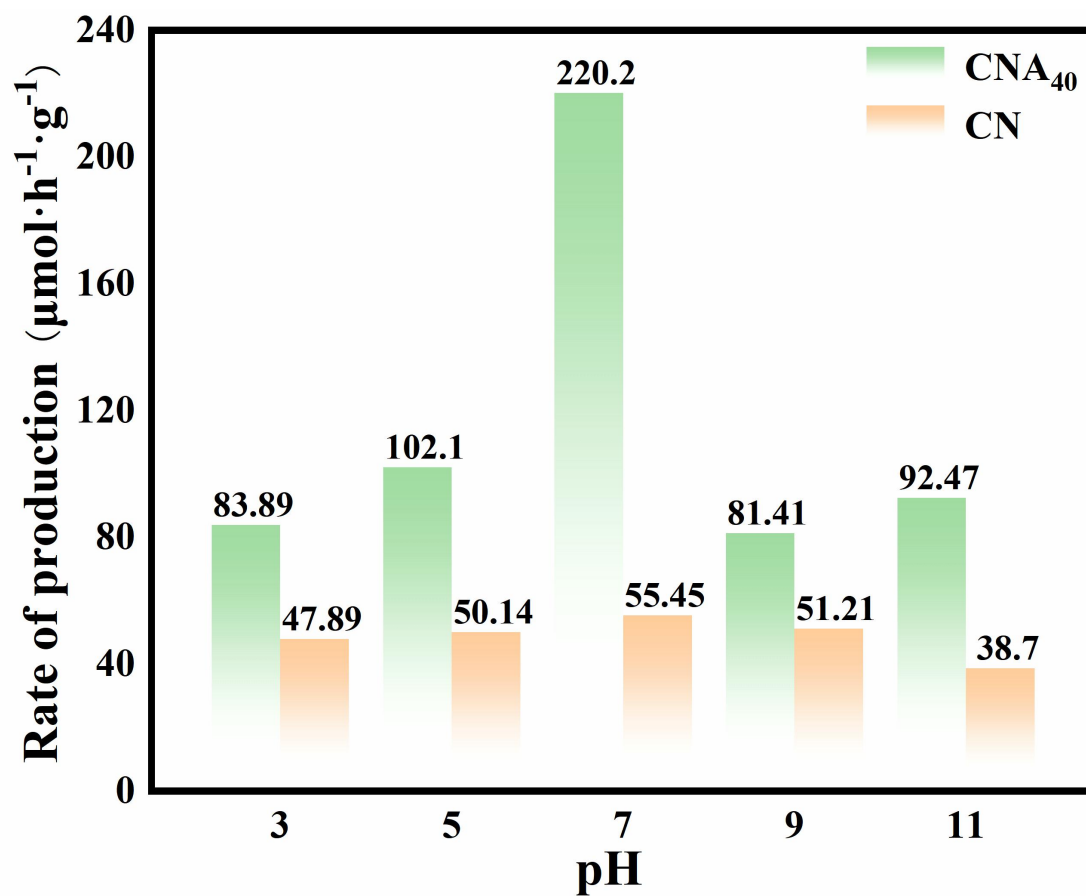

Fig. S2 Effect of solution pH on the piezocatalytic hydrogen production performance of CNA<sub>40</sub> and CN catalysts.

Figure S3

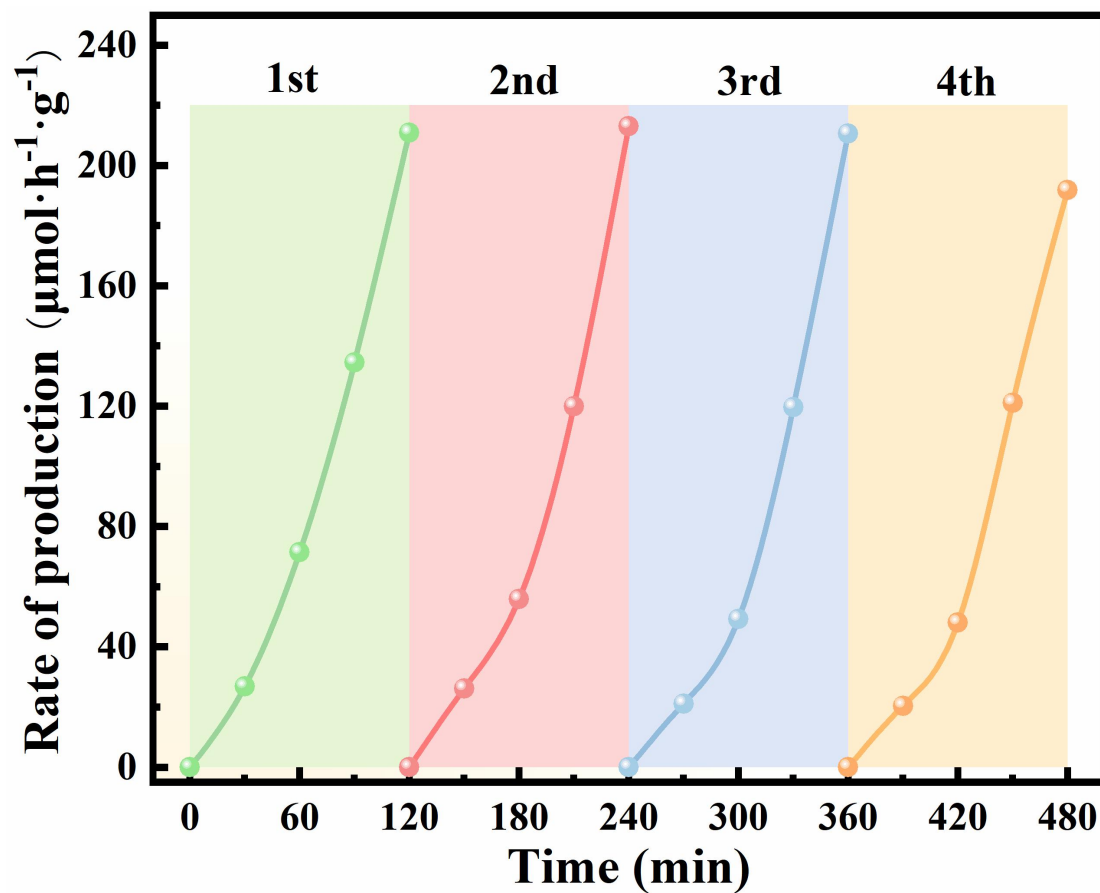

Fig. S3 Long-term cyclic piezocatalytic hydrogen evolution performance of CNA<sub>40</sub> catalyst.

**Figure S4**

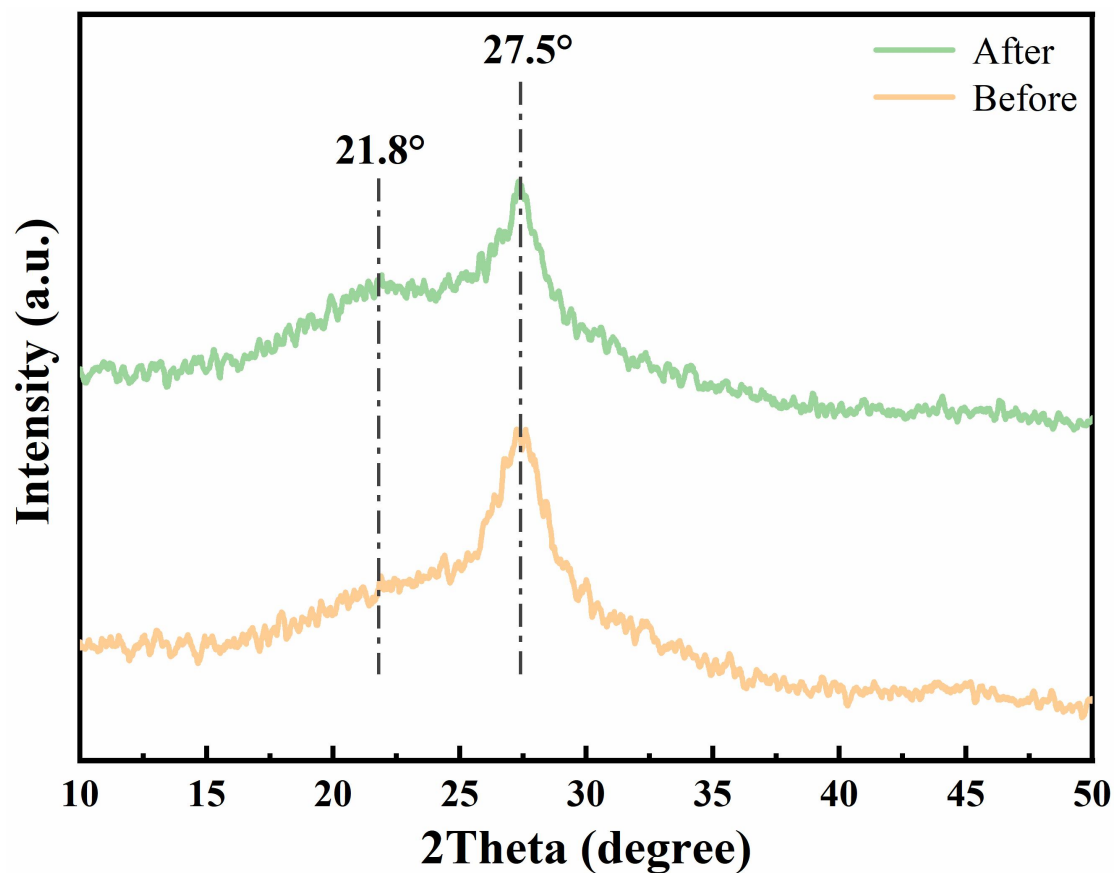

**Fig. S4** Comparison of XRD patterns of CNA<sub>40</sub> before and after piezocatalytic reaction.

Tests were carried out on CNA<sub>40</sub> after the fourth round of the cycle. As shown in the XRD patterns in Fig. S4, the characteristic diffraction peak positions of CNA<sub>40</sub> remain completely unchanged before and after the reaction. This confirms that the intrinsic crystal framework of the material remains intact and no new phases are formed. A slight decrease in the intensity of the (002) peak at 27.5° is accompanied by a marginal reduction in crystallinity.

## Figure S5

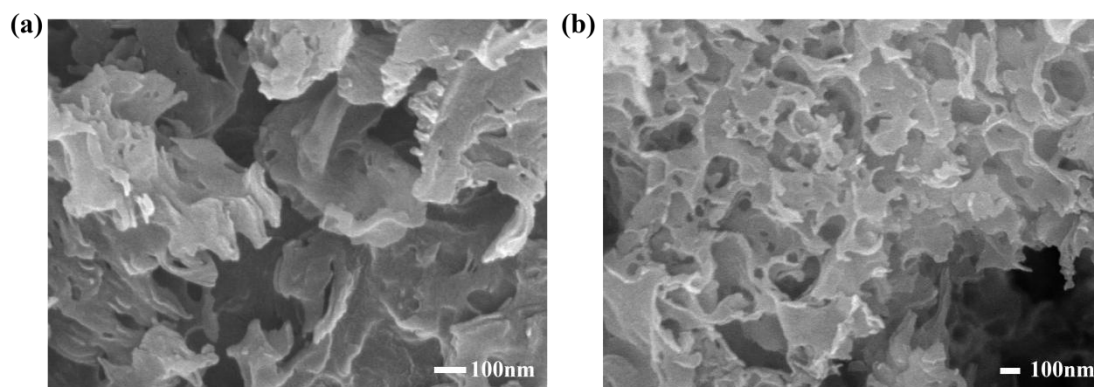

**Fig. S5** SEM characterization of the morphology of CNA<sub>40</sub> after piezocatalytic hydrogen evolution reaction.

Furthermore, the SEM images (Fig. S5) demonstrate that CNA<sub>40</sub> retains its typical two-dimensional layered nanosheet structure before and after the reaction. No significant differences are observed in the morphology, size, or stacking state of the nanosheets, and no obvious agglomeration, fragmentation, or structural collapse is detected. After the reaction, the surface porosity of the nanosheets slightly increases. It is speculated that this is caused by mild adjustment under continuous mechanical stress during the piezocatalytic process, which does not affect the overall morphology of the material.

## Calculation of energy conversion efficiency

The efficiency of converting mechanical energy to chemical energy is estimated by the ratio of the output chemical energy and the ultrasonic energy received by the reaction suspension. During the piezocatalytic reaction, the liquid level of the suspension in the reactor is kept equal to the external propagation medium (water) as illustrated in Scheme S1.<sup>[1]</sup>

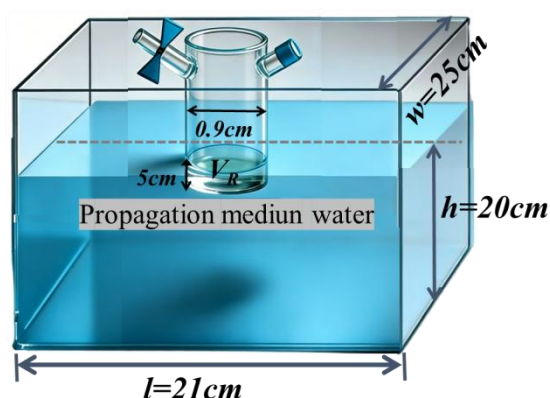

Scheme S1 Schematic diagram of piezocatalytic reaction unit.

The volume of the reactor immersed in propagation medium (water),  $V_R$

$$V_R = \pi * (5/2)^2 * 0.9 \text{ cm}^3 = 17.67 \text{ cm}^3$$

The volume of propagation medium (water),  $V_0$

$$V_0 = lwh = 21 * 25 * 20 \text{ cm}^3 = 10500 \text{ cm}^3$$

The ultrasonic power received by the reactor,  $I_R$

$$I_R = P_0 * (V_R/V_0) = 100 * (17.67/10500) \text{ W} = 0.1683 \text{ W}$$

Where  $P_0$  = ultrasonic power from the ultrasonic generator.

The reflectivity of glass tube against the ultrasonic vibrations,  $R$

$$R = \left( \frac{\rho(\text{glass})c(\text{glass}) - \rho(\text{water})c(\text{water})}{\rho(\text{glass})c(\text{glass}) + \rho(\text{water})c(\text{water})} \right) = \left( \frac{2.8 * 2E8 - 1.0 * 2.25E8}{2.8 * 2E8 + 1.0 * 2.25E8} \right)$$

$$= 0.185$$

Where  $\rho$  = density of media;  $c$  = speed of light in media.

The ultrasonic energy received by the reaction suspension,  $E_{mech}$

$$E_{mech} = (1-R) * I_R * t = (1-0.185) * 0.1683 * 3600 J = 493.7922 J$$

The output chemical energy,  $E_{chem}$

$$E_{chem} = 2n_{H_2}E_t e N_A = 2 * 4.26E(-6)(mol) * 1.23(eV) * 1.602E(-19) * 6.02E(23) = 1.01 J$$

Where  $n_{H_2}$  = hydrogen produced in moles;  $E_t$  = threshold energy of water decomposition = 1.23 eV;  $N_A$  = Avogadro's number;  $e$  = electron volt.

The energy conversion efficiency of sample,  $\eta$

$$\eta = (E_{chem} / E_{mech}) * 100\% = 0.2\%$$

**Table S1.** Comparison of piezocatalytic H<sub>2</sub> production performance over typical piezocatalysts previous reported and aromatic carbon rings embedded in carbon nitride in this work.

| Piezocatalysts                                                                 | Catalytic Conditions                                    | Sacrificial Agents          | Multiplication factor | Catalytic Activity                            | Ref.      |
|--------------------------------------------------------------------------------|---------------------------------------------------------|-----------------------------|-----------------------|-----------------------------------------------|-----------|
| Aromatic carbon rings embedded in g-C <sub>3</sub> N <sub>4</sub>              | Ultrasonic vibration (50 W, 40 KHz)                     | None                        | 3.75                  | 214.69 μmol·g <sup>-1</sup> ·h <sup>-1</sup>  | This Work |
| Tubular g-C <sub>3</sub> N <sub>4</sub>                                        | Ultrasonic vibration (160 W, 40 KHz)                    | 1.4 mol/L glucose, 2 wt% Pt | 2.7                   | 2014.7 μmol·g <sup>-1</sup> ·h <sup>-1</sup>  | [2]       |
| Carbon ring doped g-C <sub>3</sub> N <sub>4</sub>                              | Ultrasonic vibration (160 W, 40 KHz)                    | 250 g/L glucose, 2 wt% Pt   | 2                     | 1473.2 μmol·g <sup>-1</sup> ·h <sup>-1</sup>  | [3]       |
| Nitrogen vacancy and Cl doping of g-C <sub>3</sub> N <sub>4</sub>              | Ultrasonic vibration (160 W, 40 KHz)                    | 250 g/L glucose, 2 wt% Pt   | 2.6                   | 1961 μmol·g <sup>-1</sup> ·h <sup>-1</sup>    | [4]       |
| Silver monatomic and cluster co-modified g-C <sub>3</sub> N <sub>4</sub>       | No specific explanation provided                        | None                        | 2.1                   | 7.90 mmol·g <sup>-1</sup> ·h <sup>-1</sup>    | [5]       |
| 1T/2H flake-like MoS <sub>2</sub> / protonated g-C <sub>3</sub> N <sub>4</sub> | Ultrasonic vibration (150 W, 40 KHz)                    | 10 vol% Triethanolamine     | 3.3                   | 1070 μmol·g <sup>-1</sup> ·h <sup>-1</sup>    | [6]       |
| g-C <sub>3</sub> N <sub>4</sub> /ZnO nanorods                                  | Ultrasonic vibration (60 W, 40 KHz, 50 W visible light) | 10 vol% methanol            | 1.81                  | 1497.5 μmol·g <sup>-1</sup> ·h <sup>-1</sup>  | [7]       |
| Sulfur vacancies control MoS <sub>2</sub>                                      | Ultrasonic vibration (80 W, 40 KHz)                     | MeOH                        | 3.24                  | 1423.29 μmol·g <sup>-1</sup> ·h <sup>-1</sup> | [8]       |
| O vacancies control MoS <sub>2</sub>                                           | Ultrasonic vibration (100 W, 40 KHz)                    | H <sub>2</sub> O            | 2.36                  | 47.75 μmol·g <sup>-1</sup> ·h <sup>-1</sup>   | [9]       |
| Sn doped into SrTiO <sub>3</sub>                                               | Ultrasonic vibration (80 W, 40 KHz)                     | None                        | 3.28                  | 101.46 μmol·g <sup>-1</sup> ·h <sup>-1</sup>  | [10]      |
| MoS <sub>2</sub> @Mo <sub>2</sub> CT <sub>x</sub>                              | Ultrasonic vibration (300 W, 40 KHz)                    | MeOH                        | 3.06                  | 1164.8 μmol·g <sup>-1</sup> ·h <sup>-1</sup>  | [11]      |
| MoS <sub>2</sub> /ZnO/CuFe <sub>2</sub> O <sub>4</sub> nanosheets              | Magnetic stirring at 400 rpm                            | 10 vol% methanol            | 2.19                  | 3150 μmol·g <sup>-1</sup> ·h <sup>-1</sup>    | [12]      |

## References

- [1] W. Feng, J. Yuan, L. Zhang, W. Hu, Z. Wu, X. Wang, X. Huang, P. Liu and S. Zhang, *Appl. Catal. B: Environ.*, **2020**, 277, 119250.
- [2] J. Nie, J. Guo, S. Liang, S. Li, H. Yu and C. Wu, *Chem. Commun.*, **2026**, 1359–1364.
- [3] J. Nie, S. Yue, B. Li, J. Guo and C. Wu, *Ceram. Int.*, **2025**, 51, 31370–31377.
- [4] K. Zhang, X. Sun, H. Hu, G. Yan, A. Qin, Y. Ma, H. Huang and T. Ma, *Small*, **2023**, 19, 6810–6829.
- [5] C. Hu, J. Hu, Z. Zhu, Y. Lu, S. Chu, T. Ma, Y. Zhang and H. Huang, *Angewandte Chemie International Edition*, **2022**, 61, 12397.
- [6] Y. Wang, H. Ma, J. Liu, Z. Zhang, Y. Yu and S. Zuo, *J. Colloid Interface Sci.*, **2024**, 665, 655–680.
- [7] P. Gotipamul, R. Maheswaran, S. Pandiaraj, S. A. Alqarni and S. Chidambaram, *Mater. Today Sustain.*, **2023**, 24, 100501.
- [8] S. Mondal, K. Dilly Rajan, L. Patra, M. Rathinam and V. Ganesh, *Small*, **2025**, 21.
- [9] R. Lei, F. Gao, J. Yuan, C. Jiang, X. Fu, W. Feng and P. Liu, *Appl. Surf. Sci.*, **2022**, 576, 151851.
- [10] Z. Chen, W. Liu, L. Zheng, Q. Chen, Y. Liu, S. Lan and M. Zhu, *Sep. Purif. Technol.*, **2025**, 353, 128307.
- [11] H. Y. Lin and J. M. Wu, *Adv. Energy Mater.*, **2024**, 14, 02164.
- [12] M. Lu and X. Wu, *ACS Appl. Nano Mater.*, **2025**, 8, 5078–5091.
